## Identification and Characterization of Two Novel Truncated but Functional Isoforms of the Somatostatin Receptor Subtype 5 Differentially Present in Pituitary Tumors

Mario Durán-Prado, Manuel D. Gahete, Antonio J. Martínez-Fuentes, Raúl M. Luque, Ana Quintero, Susan M. Webb, Pedro Benito-López, Alfonso Leal, Stefan Schulz, F. Gracia-Navarro, María M. Malagón, and Justo P. Castaño

Department of Cell Biology, Physiology, and Immunology (M.D.-P., M.D.G., A.J.M.-F., R.M.L., A.Q., F.G.-N., M.M.M., J.P.C.), University of Córdoba, and Centro de Investigación Biomédica en Red Fisiopatología de la Obesidad y Nutrición, E-14014 Córdoba Spain; Department of Endocrinology (S.M.W.), Hospital Sant Pau, Centre for Biomedical Research on Rare Diseases (Centro de Investigación Biomédica en Red de Enfermedades Raras Unit 747), Autonomous University of Barcelona, 08035 Barcelona Spain; Service of Endocrinology and Nutrition (P.B.-L.), Reina Sofia Hospital, 14004 Cordoba, Spain; Division of Endocrinology (A.L.), Virgen del Rocio University Hospital, 41013 Sevilla, Spain; and Department of Pharmacology (S.S.), Julius-Maximilians-University, 97078 Würzburg, Germany

**Context:** Somatostatin and its related peptide cortistatin exert multiple actions on normal and tumoral tissue targets through a family of receptors termed somatostatin receptor (sst)1-5. Despite the considerable advances in the knowledge on these receptors and their (patho)physiological roles, there is still evidence that additional receptors for these peptides should exist to fully explain their actions.

**Objective:** The growing number of spliced variants found in similar receptor families, often present in tumors, and results from our group obtained on sst5 from other species (pig) led us to explore the existence of new human sst5 isoforms.

**Design and Results:** A rapid amplification of cDNA ends PCR approach on samples from a human pituitary tumor and a cell line enabled identification of two novel alternatively spliced sst5 receptor variants. The sequences obtained encode putative proteins that correspond to truncated isoforms of five and four transmembrane domains (TMDs), accordingly named sst5TMD5 and sst5TMD4, respectively. Both novel receptors show a differential expression pattern in normal tissues and are also present in pituitary tumors of diverse etiology including nonfunctioning adenomas, corticotropinomas, somatotropinomas, and a prolactinoma. In contrast to the predominant plasma membrane localization of full-length sst5, both sst5TMD5 and sst5TMD4 show a preferentially intracellular localization. Despite their truncated nature, both receptors are functional, as shown by their ability to mediate selective, ligand-induced rises in free cytosolic calcium concentration. Specifically, whereas sst5TMD5 is selectively activated by somatostatin compared with cortistatin, cells transfected with sst5TMD4 almost exclusively respond to cortistatin and not to somatostatin.

**Conclusions:** Our results demonstrate the existence of two previously unidentified sst5 spliced variants with distinct distribution in normal tissues and pituitary tumors, unique ligand-selective signaling properties, and subcellular distribution, which could contribute to somatostatin and cortistatin signaling in normal and tumoral cells. (*J Clin Endocrinol Metab* 94: 2634–2643, 2009)

The importance of somatostatin (SRIF) in the regulation of a number of physiological processes and their related pathologies is nowadays unequivocally established (1–3). This tetradecapeptide exerts multiple biological actions through activation of a family G protein-coupled receptors (GPCRs), termed somatostatin receptors (sst) (2–4). To date, five isoforms (sst1–sst5) and the alternative splice variant sst2B (5, 6) have been isolated and characterized (2–4). These receptors seem also to mediate most actions of cortistatin (CST), a peptide highly similar to SRIF (7), which shows a wide distribution in normal and tumoral tissues (8). CST essentially mimics the endocrine actions of SRIF (9), although its precise physiological role and relevance is still to be elucidated. However, CST also exerts unique functions, particularly within the central nervous system (7) and in inflammatory processes (10, 11), and the receptors involved in these processes are still unknown.

The wide expression pattern of ssts in normal and pathological conditions, coupled to their inhibitory actions upon SRIF and CST binding, has served as basis for development and application of SRIF analogs with agonistic properties to identify and treat different tumor pathologies (1) specially in endocrine-related diseases such as pituitary tumors (12). However, success of this therapeutic approach has been often hampered by the fact that some patients respond to treatment with SRIF analogs, whereas some are partial responders, and others do not respond at all, suggesting the potential importance of the expression pattern of the ssts in each pathology (1–3, 12). Actually, studies on samples from patients suffering of pituitary tumors, especially GH-secreting adenomas causing acromegaly, with divergent responses to SRIF agonist therapy, has helped to establish that the degree of response to the treatment is strongly correlated to the type and abundance of ssts present in the target tissue (13).

Despite the wealth of knowledge gathered in recent years on the pathophysiology of SRIF/CST/ssts, there are still a number of unsolved questions, which have led several authors to propose the existence of additional receptors and/or signaling mechanisms, either related or not to the sst family, to explain their findings (14–17). Thus, for example, there is still a number of tumors that escape to the control of treatment with potent sst agonists that cannot be explained based on a specific sst profile (15–17).

Recent evidence indicates that within the GPCR superfamily, there are mechanisms to increase receptor variability involving generation of splicing variants with less than seven transmembrane domains (TMDs) (18–22). Such truncated receptors, which may possess their own function or regulate the function of their respective long, canonical receptor isoforms (18), are frequently associated with tumor pathologies, as GH-releasing factor receptor (19, 20), cholecystokinin receptor (22), or adrenoceptors (21).

The family of ssts is known to be uniquely comprised by intronless genes, thereby rendering them as good candidates for uncommon splicing mechanisms, such as the one that generates the only sst subtype variants known to date, the long (sst2A) and short (sst2B) isoforms of the sst2 gene, generated due to the presence of a cryptic splice site (5, 6). However, and despite strong evidence that additional, unidentified receptor variants

may exist, particularly in the case of sst5 (23), no data have been reported in this regard. In this scenario, while investigating the unique stimulatory effect caused by SRIF on GH release from cultured porcine pituitary cells (24), we recently identified novel, truncated variants of the pig sst5 (Durán-Prado, M. and Castaño, J. P., unpublished results). This led us to question whether there are analogous truncated receptor variants in the human, and if so, what are their characteristics and potential relevance. In this work, we present the first evidence for the existence of two functional human sst5 truncated isoforms of five and four TMDs termed sst5TMD5 and sst5TMD4, which show a unique expression pattern in normal tissues as well as different pituitary tumor types and display distinct functional responses to SRIF and CST.

## Patients and Methods

### Patients and samples

Pituitary tumor specimens were obtained during transsphenoidal surgery from 34 patients and corresponded to: 22 nonfunctioning pituitary adenomas (NFPAs), six GH adenomas, four corticotropinomas, one prolactinoma, and one TSHoma. After surgery, tumors were immediately frozen until RNA extraction. A commercial panel of total RNA from various human tissues was obtained from CLONTECH (Human Total Master Panel II and human pituitary gland poly-A RNA; Palo Alto, CA). This study was approved by the Ethics Committee of the University of Cordoba and hospitals Reina Sofia (Cordoba), Virgen del Rocío (Sevilla), and Sant Pau (Barcelona). Informed consent was obtained from each patient before study entry.

### Nucleic acids isolation and reverse transcription (RT)

Nucleic acids were isolated with Trizol (Invitrogen, Barcelona, Spain) following the manufacturer's instructions. Human lymphocytes were used as an accessible source of genomic DNA using routine techniques. Human sst5 variants were identified by rapid amplification of cDNA ends (RACE) technology using total RNA from pituitary tumors and HeLa cells. For RT-PCR studies, 5 µg of RNA were reverse transcribed using the PowerScript reverse transcriptase kit (BD Bioscience, Eremodegem, Belgium). When the RNA was used specifically for 3' RACE cloning studies, 5 µg of total RNA were retrotranscribed using the GeneRacer oligo deoxythymidine oligonucleotide kit (Invitrogen) following the manufacturer's instructions.

### Isolation of human sst5 variants, sst5TMD5 and sst5TMD4, by RACE method

Identification, isolation, and cloning of the two new human sst5 variants were carried out using RT-PCR and RACE (GeneRacer kit; Invitrogen). Standard and nested PCRs were performed using the iCycler IQ system (Bio-Rad, Madrid, Spain) and the CERTAMP complex amplifications kit chemistry (Biotools, Madrid, Spain). For the first PCR, 100 ng of cDNA were amplified with the oligonucleotide Ra\_hum\_sst5\_3' (Table 1) combined with the GeneRacer 3' oligonucleotide (Invitrogen; Table 1). A nested PCR was carried out with 1 µl of the first PCR product, which was reamplified with primer pairs (Ra\_hum\_sst5\_3'N and GeneRacer 3' nested oligonucleotide; Invitrogen; Table 1). PCR products were electrophoresed and extracted using QuiaQuick gel extraction kit (QIAGEN, Hilden, Germany). The DNA fragments obtained were cloned into the pBluescript KSII+ plasmid (Stratagene, Madrid, Spain) and sequenced at the Servicio Centralizado de Apoyo a la Investigación of the University of Córdoba (SCAI).

**TABLE 1.** Primers used in this study

| Name                        | Sequence                      | Reference sequence |
|-----------------------------|-------------------------------|--------------------|
| RACE PCR primers            |                               |                    |
| Hum_sst5_ATG                | ATGGAGCCCCTGTCCAGCCT          | G113937340         |
| Ra_hum_sst5_3'              | TGGGTCCTGTCTCTGTGCATGTC       | G113937340         |
| Ra_hum_sst5_3'N             | CTGGTGTTGCGGACGTGCAG          | G113937340         |
| GeneRacer 3'                | GCTGTCAACGATACGCTACGTAACG     |                    |
| GeneRacer 3' Nested         | CGCTACGTAACGGCATGACAGTG       |                    |
| Cloning primers             |                               |                    |
| sst5TMD5-C_E1_S_HindIII     | TCAAGCTTCGATGGAGCCCCTGTCCAGC  | G113937340         |
| sst5TMD5-E1_AS_blunt        | CGGCGCGAAGAAGCCAGCAC          | G113937340         |
| sst5TMD5-E2-S_blunt         | CTGCTGAGAGGCAGCGGCC           | G113937340         |
| sst5TMD5-E2-AS_BamHI        | TTAGGATCCTCAGAGCAAGCCAAGTTGCC | G113937340         |
| sst5TMD4-E1_AS_blunt        | GTTGCAGGTACCGCCCTCCTG         | G113937340         |
| sst5TMD4-E3_S_blunt         | CGTCTGCCAGAGCAGGACCTC         | G113937340         |
| sst5TMD4-E3_AS_BamHI        | ACTGGATCCTCAGCCTGGCCCTTCTCCTG | G113937340         |
| Quantitative RT-PCR primers |                               |                    |
| sst5TMD5_S                  | GCGCCGTCTTCATCATCTAC          | DQ448303           |
| sst5TMD5_AS                 | CAGGAAAAGCTGGTGTGG            | DQ448303           |
| sst5TMD4_S                  | TACCTGCAACCTGTGCGC            | DQ448304           |
| sst5TMD4_AS                 | AGCCTGGGCCTTCTCCT             | DQ448304           |

Each group show the primers used in RACE-PCR (top), cloning primers (middle), and primers used in quantitative real-time PCR studies (bottom). The reference sequence at the National Center for Biotechnology Information database is indicated for each primer.

### Cloning of sst5, sst5TMD5, and sst5TMD4 into pCDNA3 and E-CFP-N1 expression vectors

The sst5 cDNA was purchased from the UMR cDNA Resource Center ([www.cdna.org](http://www.cdna.org)) and its coding sequence (CDS) was amplified by PCR with *HindIII* and *EcoRI* adaptor primers. The complete CDSs for sst5TMD5 and sst5TMD4 were amplified using a high-fidelity *Pwo* polymerase (Roche, Barcelona, Spain) and genomic DNA as template. Then both sst5 variants were assembled by triple ligation. Each of the two novel sst5 variants, sst5TMD5 and sst5TMD4, consists of two atypical exons. Exon (E1) of sst5TMD5 fully overlaps with that of sst5TMD4, and both share 645 and 561 nucleotides of the 5' end (NH<sub>2</sub> terminus of the receptor) of the long, canonical sst5, respectively. Exon 2 (E2) of sst5TMD5 only overlaps partially with E2 of sst5TMD4, being both E2 located at the 3' untranslated region of the sst5 gene (Fig. 1A). E1 of sst5TMD5 and sst5TMD4 was amplified using the sense primer (sst5TMD5-C\_E1\_S\_HindIII), which incorporates a *HindIII* restriction site, and different antisense (AS) primers (sst5TMD5-E1\_AS\_blunt and sst5TMD4-E1\_AS\_blunt, respectively; Table 1). E2 of sst5TMD5 and sst5TMD4 was amplified separately using the following primer sets: sst5TMD5-E2-S\_blunt and sst5TMD5-E2-AS\_BamHI for the sst5TMD5, and sst5TMD4-E2\_S\_blunt and sst5TMD4-E2\_AS\_BamHI in the case of the sst5TMD4 isoform, all of which incorporate a *BamHI* restriction site. Restriction enzymes (*HindIII* and *BamHI*) were used to digest both sst5TMD5 and sst5TMD4 constructs obtaining DNA fragments consisting on their respective E1 and E2. Then E1 and E2 were ligated and inserted into a pCDNA3.1 expression vector (Invitrogen) and subsequently into the E-CFP-N1 vector as previously described (25). All recombinant vectors were sequenced.

### Expression of ssts in human tissues and pituitary tumors

Development, validation, and application of quantitative real-time RT-PCR to assess mRNA levels have been previously reported (13). To control for variations in the amount of RNA and the efficiency of the RT reaction, the expression level (copy number) of two housekeeping genes, glyceraldehyde-3-phosphate dehydrogenase (GAPDH) and  $\beta$ -actin, was determined for each sample as previously reported (13). GeNorm 3.3 visual basic application for Microsoft Excel (<http://medgen.ugent.be/~jvdesomp/genorm/>) (26) was used to assess the stability of the housekeeping genes. The geometric means of the copy numbers for GAPDH and  $\beta$ -actin within each sample were used as a normalization factor (NF). Results were then reported as sst copy number minus background di-

vided by NF. The sensitivity of the quantitative real-time RT-PCR was 10 copies per 0.05  $\mu$ g total RNA. To estimate the starting copy number of cDNA, sample signal was compared with that of the standard curve run on the same plate. In addition, total RNA samples not reverse transcribed and a no-cDNA control were routinely run in each plate to control for genomic DNA contamination and to monitor potential exogenous contamination (background), respectively. Primer sets for the new truncated sstr5 variants (Table 1) were selected using Primer 3 software (<http://frodo.wi.mit.edu/>) with human mRNA sequences as templates. Primer set selection and validation for the sst1-5 subtypes and housekeeping genes were previously reported (13).

### Antibodies and immunostaining

Immunostaining of human sst5 variants was carried out using two different rabbit polyclonal antisera, which were generated through a commercial source (Genosphere Biotechnologies, Paris, France). A polyclonal antiserum (sst5 antibody) was generated against the sequence MEPLFPASTPSWNAC, which is located at the common NH<sub>2</sub> domain, and therefore shared by the three sst5 isoforms. A second antiserum (anti-sst5TMD4) was generated against the sequence CRERLSGHSWQKEG, which is unique for the sst5TMD4 isoform, and identified only this receptor variant.

For immunocytochemistry, CHO-K1 cells growing onto coverslips were transiently transfected with sst5, sst5TMD5, and sst5TMD4 receptors and 24 h later were fixed for 5 min in 4% paraformaldehyde, rinsed twice in PBS, and then immunolabeled for sst5 using the polyclonal anti-sst5 antibody. Cells transfected with sst5TMD4 were also immunolabeled with the anti-sst5TMD4, alone or preadsorbed with 10<sup>-5</sup> M of its blocking peptide. In addition, the specificity of the antiserum was checked in mock-transfected cells. Primary antibodies were immunostained with an antirabbit Alexa594 antibody (1:500; Molecular Probes, Barcelona, Spain). Coverslips were mounted onto slides with 4',6'-diamino-2-phenylindole (Sigma, Madrid, Spain), sealed, and stored at -20 C until their analysis.

### Immunohistochemistry

For immunohistochemical staining, 7- $\mu$ m paraffin sections from human pituitary adenomas were used. Samples were boiled for 20 min in 10 mM citric acid (pH 6.0) to retrieve antigen. To assess sst5TMD4 presence, slides were incubated overnight at 4 C with rabbit polyclonal anti-sst5TMD4 antibody. Staining of primary antibody was performed

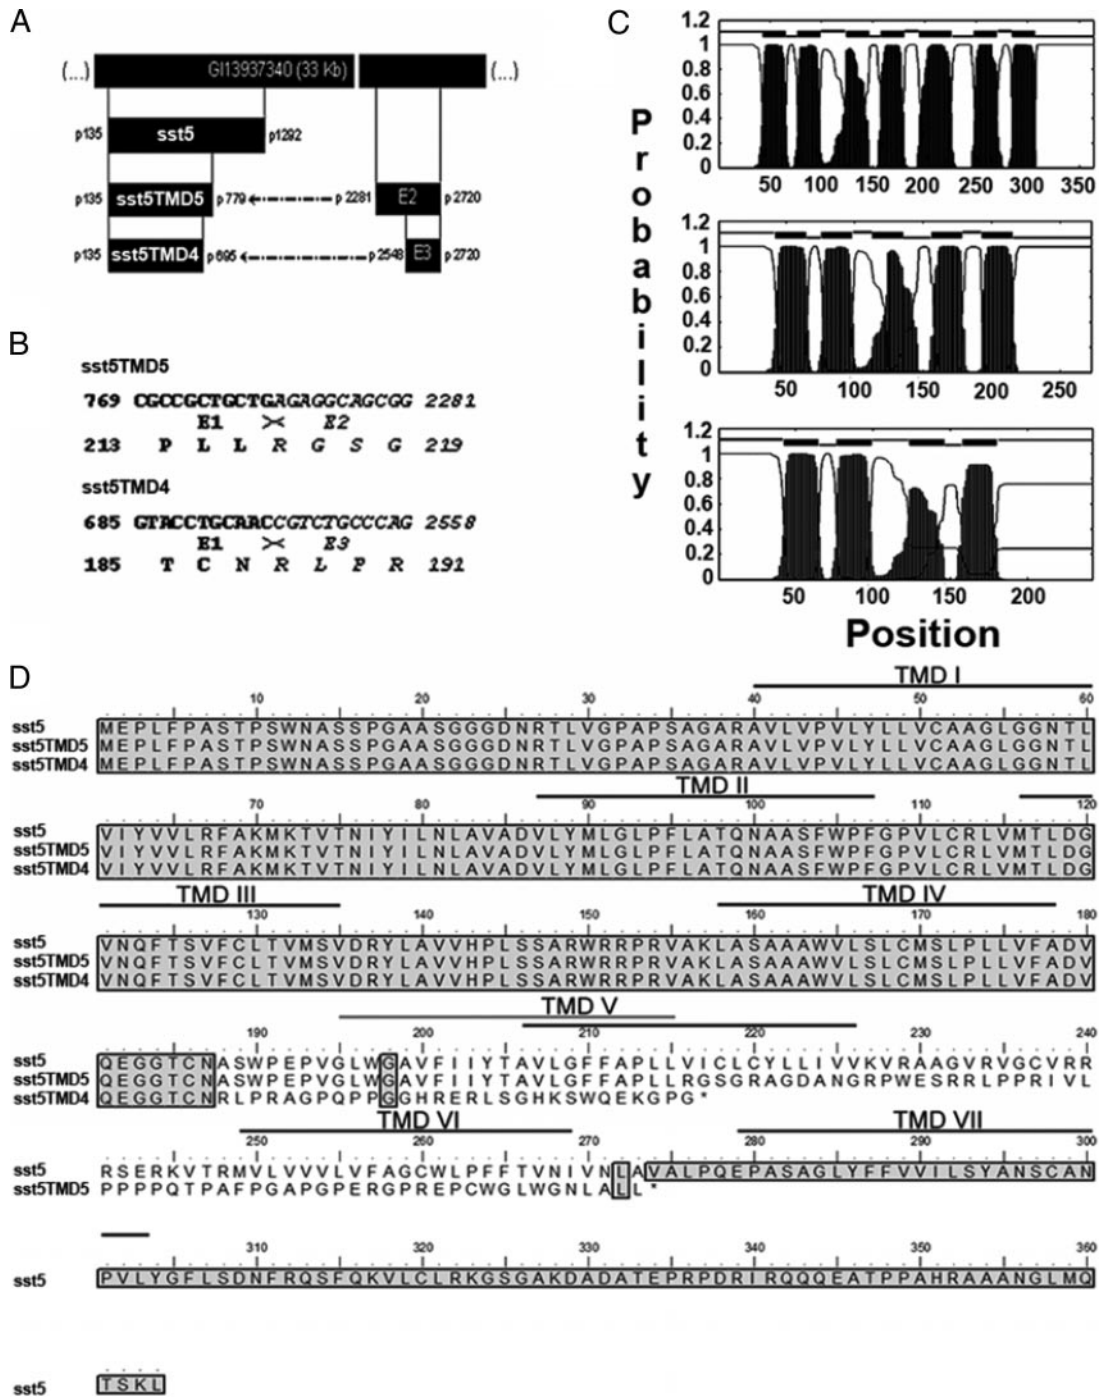

**FIG. 1.** Molecular identification and characterization of the novel sst5 truncated variants. A, Genomic structure of the human sst5 gene containing the truncated sst5 isoforms. B, Sequence of the junction between the cryptic exons that give rise to the CDS of the truncated sst5TMD5 and sst5TMD4. C, Hydrophobicity profiles of full-length sst5 (top panel), sst5TMD5 (middle panel), and sst5TMD4 (bottom panel) obtained with the program TMHMM (<http://www.cbs.dtu.dk/services/TMHMM-2.0/>). D, Sequence alignment of the three sst5 isoforms performed with ClustalW (<http://ebi.ac.uk/Tools/clustalw2/index.html>). Identity is shadowed and boxed. Their predicted TMDs are indicated above.

following the protocol described in the Vectastain ABC-AP kit (Vector Laboratories, Inc., Burlingame, CA) and then counterstained with hematoxylin. Parallel samples were immunolabeled with the same anti-serum preadsorbed with molar excess of the immunizing peptide to ensure specificity of signal.

### Subcellular localization of sst5 variants

Subcellular localization of each sst5 isoform coupled in frame to E-CFP or immunolabeled as described above was assayed by confocal microscopy

as described previously (25). Images were acquired with an Espectral TCS-SP2-AOBS confocal microscope (Leica Corp., Heidelberg, Germany) with the cyan fluorescent protein (CFP) settings. Alternatively, colocalization in CHO-K1 living cells of each CFP-tagged receptor with the lipophilic membrane marker FM5-95 (Molecular Probes) was evaluated using a Eclipse TE2000-E (Nikon, Tokyo, Japan). Briefly, FM5-95 signal was used to define a region at the plasma membrane and measure the CFP signal contained in it. Membrane fluorescence was subtracted to whole-cell CFP signal. Analysis was done with ImageJ (Bethesda, MD).



### Measurement of intracellular free calcium concentration ([Ca<sup>2+</sup>]<sub>i</sub>)

CHO-K1 cells stably transfected with sst5, sst5TMD5, or sst5TMD4 were grown onto glass coverslips for 24 h and incubated for 30 min at 37 C with 2.5 μM fura-2 AM (Molecular Probes, Eugene, OR) in phenol red-free DMEM containing 20 mM NaHCO<sub>3</sub> (pH 7.4). Coverslips were washed with DMEM and cells imaged as described previously (25). Changes in [Ca<sup>2+</sup>]<sub>i</sub> were recorded as ratio of the corresponding excitation wavelengths (F340/F380) after background subtraction using MetaFluor software (Imaging Corporation, West Chester, PA).

## Results

### Cloning of human sst5 spliced isoforms

Two bands corresponding to novel variants of sst5 were obtained by RACE PCR. The first one, 650 bp, was initially obtained from HeLa cells, whereas the second band, 300 bp, was amplified from a pituitary corticotropinoma (not included in Table 2). Bioinformatic analysis of their sequences revealed a complete identity with discontinuous segments of a genomic sequence containing the sst5 gene (GenInfo Identifier: 13937340) (Fig. 1A). Specifically, the sequence of 650 bp, which subsequently led to identify the sst5TMD5 variant, was found to have full identity against two different and distant areas of the human genomic sequence: the first one containing nucleotides 135-779 (E1), which corresponds to the middle area of the fifth TMD of

the sst5, and the second one containing nucleotides 2281-2720 (E2), which encodes a unique COOH-terminal tail in the truncated sst5TMD5 not shared by the canonical, full-length sst5 isoform. Similarly, the sequence of 300 bp, which subsequently led to clone the sst5TMD4 variant, was found to have full identity against two different areas of the human genomic sequence: the first one containing nucleotides 135-695 (E1), which corresponds to the area between the fourth and fifth TMD of the sst5, and a second one containing nucleotides 2548-2720 (E2), which would also encode a unique COOH-terminal tail. It should be noted that, despite the partial overlapping between E2 of the sst5TMD5 and sst5TMD4 variants, the predicted amino acid sequence of this truncated isoforms differ in the COOH terminal tail due to a frame shift on the starting nucleotide sequence of E2. In both cases, the exons junction differs from a consensus sequence (Fig. 1B).

The complete CDS of 822 and 651 nucleotides for the sst5TMD5 and sst5TMD4, respectively, which were subsequently cloned as described in *Materials and Methods*, would encode proteins of 273 and 216 amino acids. Analysis of their corresponding secondary structures (hydrophobicity profiles) indicated that these sequences would encode truncated sst5 variants with five and four putative TMDs, and thus the receptor variants were termed sst5TMD5 and sst5TMD4, respectively (Fig. 1, C and D). Both newly identified sst5 variants possess the conserved DRY motif at the end of the third TMD (3), which is

**TABLE 2.** Absolute quantification of ssts and mRNA copy number in pituitary tumors

| Identifier | Tumor type       | sst1/NF | AVG  | sst2/NF | AVG            | sst3/NF | AVG          | sst5/NF | AVG          | sst5TMD5/NF | AVG  | sst5TMD4/NF | AVG    |
|------------|------------------|---------|------|---------|----------------|---------|--------------|---------|--------------|-------------|------|-------------|--------|
| NF1        | NFPA             | 46      | 62   | 8,825   | 1989           | 3,206   | 4363         | 134     | 1152         | 0           | 95.5 | 95          | 1,410  |
| NF2        | NFPA             | 65      |      | 321     |                | 136     |              | 0       |              | 1473        |      | 18,389      |        |
| NF3        | NFPA             | 0       |      | 3,123   |                | 12,198  |              | 786     |              | 0           |      | 318         |        |
| NF4        | NFPA             | 0       |      | 1,836   |                | 11,321  |              | 221     |              | 0           |      | 1,110       |        |
| NF5        | NFPA             | 339     |      | 131     |                | 2,607   |              | 102     |              | 0           |      | 210         |        |
| NF6        | NFPA             | 53      |      | 4,575   |                | 4,709   |              | 22      |              | 0           |      | 356         |        |
| NF7        | NFPA             | 59      |      | 352     |                | 3,756   |              | 4       |              | 0           |      | 337         |        |
| NF8        | NFPA             | 0       |      | 3,583   |                | 12,333  |              | 685     |              | 0           |      | 139         |        |
| NF9        | NFPA             | 55      |      | 173     |                | 3,508   |              | 0       |              | 0           |      | 171         |        |
| NF10       | NFPA             | 0       |      | 34      |                | 1       |              | 8       |              | 0           |      | 14          |        |
| NF11       | NFPA             | 424     |      | 459     |                | 998     |              | 10      |              | 0           |      | 2,367       |        |
| NF12       | NFPA             | 0       |      | 10,205  |                | 12,367  |              | 40      |              | 0           |      | 1,752       |        |
| NF13       | NFPA             | 0       |      | 54      |                | 8,283   |              | 15      |              | 0           |      | 366         |        |
| NF14       | NFPA             | 258     |      | 1,944   |                | 47      |              | 19,624  |              | 0           |      | 777         |        |
| NF15       | NFPA             | 0       |      | 201     |                | 1,379   |              | 0       |              | 131         |      | 132         |        |
| NF16       | NFPA             | 0       |      | 520     |                | 1,212   |              | 11      |              | 90          |      | 83          |        |
| NF17       | NFPA             | 0       |      | 122     |                | 4,289   |              | 8       |              | 45          |      | 59          |        |
| NF18       | NFPA             | 0       |      | 535     |                | 2,736   |              | 17      |              | 362         |      | 509         |        |
| NF19       | NFPA             | 0       |      | 125     |                | 5,617   |              | 0       |              | 0           |      | 38          |        |
| NF20       | NFPA             | 71      |      | 308     |                | 2,449   |              | 5       |              | 0           |      | 3,501       |        |
| NF21       | NFPA             | 0       |      | 6,188   |                | 12      |              | 3,653   |              | 0           |      | 82          |        |
| NF22       | NFPA             | 0       |      | 160     |                | 2,829   |              | 17      |              | 0           |      | 232         |        |
| AC1        | Somatotropinoma  | 896     | 1016 | 12,638  | 8842           | 430     | 411          | 1,959   | 9825         | 0           | 133  | 10,354      | 2,776  |
| AC2        | Somatotropinoma  | 233     |      | 16,822  | <sup>a,b</sup> | 350     | <sup>a</sup> | 19,024  | <sup>a</sup> | 549         |      | 0           |        |
| AC3        | Somatotropinoma  | 0       |      | 13,531  |                | 669     |              | 9,758   |              | 0           |      | 218         |        |
| AC4        | Somatotropinoma  | 0       |      | 4,719   |                | 959     |              | 6,638   |              | 0           |      | 103         |        |
| AC5        | Somatotropinoma  | 4970    |      | 4,440   |                | 0       |              | 6,626   |              | 251         |      | 424         |        |
| AC6        | Somatotropinoma  | 0       |      | 905     |                | 63      |              | 14,947  |              | 0           |      | 5,559       |        |
| CU1        | Corticotropinoma | 465     | 641  | 153     | 458            | 21      | 255          | 9,650   | 6408         | 0           |      | 48,132      | 13,030 |
| CU2        | Corticotropinoma | 674     |      | 1,535   |                | 921     | <sup>a</sup> | 7,210   | <sup>a</sup> | 0           |      | 3,244       |        |
| CU3        | Corticotropinoma | 267     |      | 103     |                | 47      |              | 8,775   |              | 0           |      | 565         |        |
| CU4        | Corticotropinoma | 1159    |      | 44      |                | 31      |              | 0       |              | 0           |      | 182         |        |
| PRL        | Prolactinoma     | 4006    |      | 339     |                | 6       |              | 52      |              | 0           |      | 1,315       |        |
| TSH        | TSHoma           | 0       |      | 44,652  |                | 22      |              | 791     |              | 0           |      | 0           |        |
| NP         | Normal pituitary | 210     |      | 1,075   |                | 354     |              | 3,708   |              | 0           |      | 0           |        |

Expression is shown as copy number normalized against a NF, obtained from the level of GAPDH and β-actin, using the GeNorm 3.3 visual basic application for Microsoft Excel. PRL, Prolactinoma. The averaged value (AVG), obtained for each sst in each tumor group is shown. <sup>a</sup>, *P* < 0.05 vs. NFPA; <sup>b</sup>, *P* < 0.005 vs. CU.

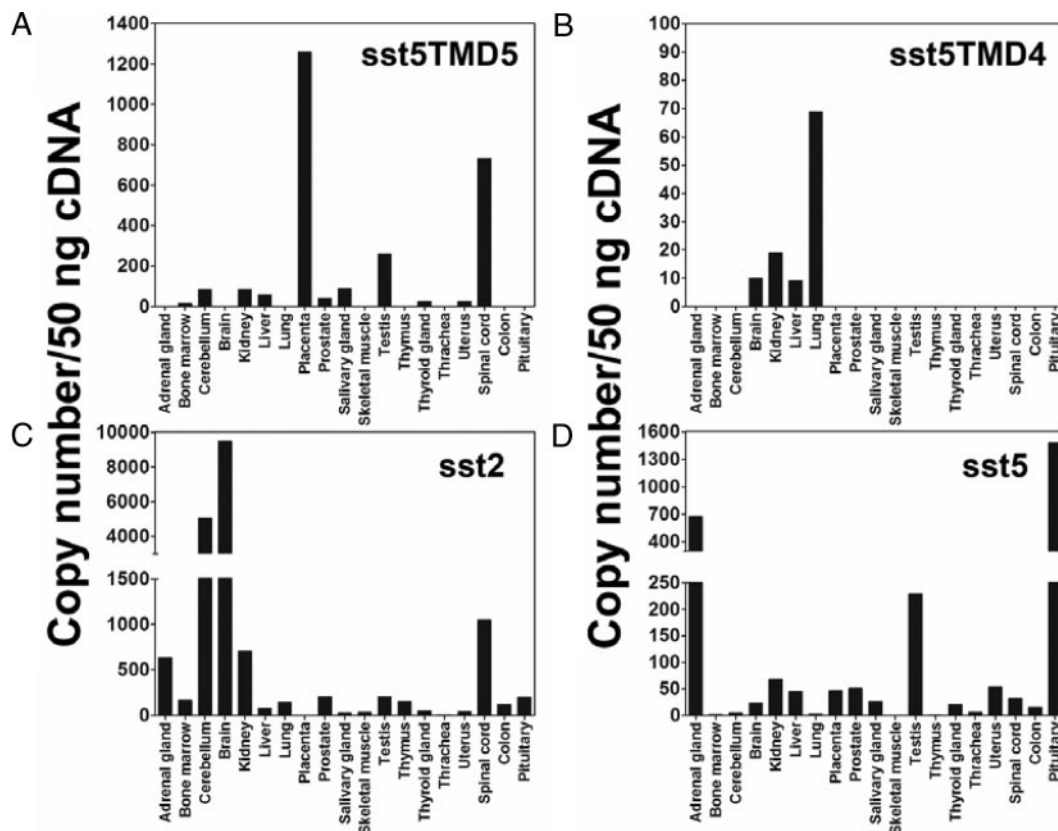

**FIG. 2.** Quantification of ssts in a cDNA panel (CLONTECH). The expression level of sst5TMD5 (A), sst5TMD4 (B), sst2 (C), and sst5 (D), was evaluated by real-time quantitative PCR and is shown as absolute copy number in 50 ng of cDNA.

involved in  $G\alpha$  protein coupling and selectivity (27, 28) but are truncated before the YANSCANPVLV signature motif that defines the family of mammalian sst receptors (2). Moreover, the resulting COOH-terminal domain of sst5TMD5 (intracellular) and sst5TMD4 (extracellular) do not present significant similarity with other previously known sst domains of any species nor with any known protein. The new sequences for both sst5 variants have been deposited at the National Center for Biotechnology Information database (Bethesda, MD) with accession no. DQ448303 (sst5TMD5) and DQ448304 (sst5TMD4).

#### Distribution of sst isoforms in normal tissues

sst5TMD5 is expressed in the 11 of 19 tissues analyzed (Fig. 2A), showing appreciable levels in placenta, spinal cord, and testis (1260, 730, and 261 copies per 50 ng cDNA, respectively). Conversely, sst5TMD4 was barely expressed in normal tissues, showing highest levels in lung (69 copies) and detectable but low levels (<20 copies) in liver, brain, and kidney (Fig. 2B). Both sst2 and sst5 were found to be widely expressed (Fig. 2, C and D, respectively) and coexpressed with sst5TMD5 in 11 of 19 samples, although without quantitative correlation.

#### Expression of ssts in pituitary tumors

ssts expression was screened in 34 pituitary tumors of diverse etiology (Table 2 and Fig. 3). sst1 was found to be expressed in 50% tumors analyzed (Table 2). sst3 was the predominant receptor found in NFPA (Fig. 3A and Table 2,  $P < 0.05$  vs. somatotropinoma and corticotropinoma). Somatotropinoma

showed high levels of sst2 (Fig. 3B and Table 2,  $P < 0.05$  and  $P < 0.005$  vs. NFPA and corticotropinoma, respectively) and sst5 (Fig. 3B and Table 2,  $P < 0.05$  vs. NFPA). Corticotropinoma were characterized by high levels of sst5 (Fig. 3C and Table 2,  $P < 0.05$  vs. NFPA). Only one prolactinoma (Fig. 3D and Table 2) and one THSoma (Fig. 3E and Table 2) were analyzed, showing predominance of sst1 and sst2, respectively. Expression of sst4 was not examined in this study, given its reported negligible expression in normal and adenomatous pituitary tissue. Expression of sst5TMD5 was detected in seven of 34 samples, specifically five of 22 NFPA and two of six somatotropinomas. Neither quantitative nor qualitative correlation was found between sst5TMD5 expression and tumor type (Table 2). sst5TMD4, infrequently and slightly expressed in normal tissues, was detected in 32 of 34 tumors (Table 2). Expression levels were variable, with some tumors showing high expression [e.g. NF2, NF4, NF11, NF12, NF20, somatotropinoma (AC)-1, AC6, corticotropinoma (CU)-1, CU2]. As for sst5TMD5, neither quantitative nor qualitative correlation was found between sst5TMD4 expression and tumor type (Table 2). Nevertheless, in NFPAs and somatotropinomas, the expression level of this receptor is close to that of other ssts. Both truncated receptors were absent in normal pituitary (Table 2 and Fig. 3F).

#### Subcellular localization of sst5 isoforms

Study of subcellular localization of sst5 isoforms revealed that whereas full-length sst5 is preferentially located at the plasma membrane (Fig. 4, A and E), both truncated isoforms sst5TMD5

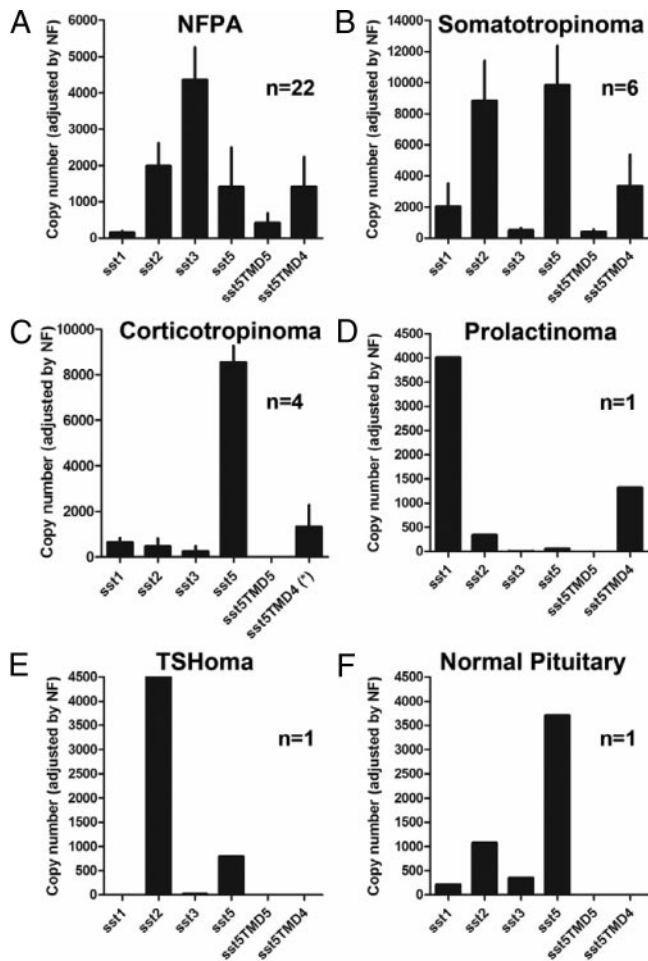

**FIG. 3.** sst expression profile in a set of pituitary tumors and normal pituitary. The absolute copy number of sst1, sst2, sst3, sst5, sst5TMD5, and sst5TMD4 was analyzed by quantitative real-time PCR in 34 tumor samples of diverse etiology, including nonfunctioning pituitary adenomas, NFPA (A), GHomas producing acromegaly, somatotropinoma (B), ACTH-secreting adenomas causing Cushing's disease, corticotropinoma (C), prolactinoma (D), TSHoma (E), and normal pituitary as control (F). Expression is shown as copy number normalized against a NF obtained from the level of GAPDH and  $\beta$ -actin, using the GeNorm 3.3 visual basic application for Microsoft Excel. An outlier value for sst5TMD4, labeled with an asterisk, has been excluded from C, although it is shown in Table 2. Its presence or absence does not alter any statistical significance.

(Fig. 4, B and G) and sst5TMD4 (Fig. 4, C and I) are mainly located at intracellular compartments. Nonetheless, signal in plasma membrane was detectable for sst5TMD5 and sst5TMD4. Specifically, *in vivo* colocalization of these CFP tagged receptors with the lipophilic membrane marker FM5-95 revealed that fluorescent signal located at plasma membrane for sst5TMD5 and sst5TMD4 was half that for full-length sst5 (Fig. 4D,  $P < 0.001$ ). In the case of sst5TMD4, we also developed and validated a specific antiserum, which recognizes exclusively this isoform (Fig. 4H). As shown in Fig. 4F, there was no immunostaining in mock-transfected cells or cells transfected with sst5TMD4 incubated with the preadsorbed antibody (Fig. 4J). Using this antibody, we observed expression of sst5TMD4 in two pituitary adenomas (Fig. 4, K and M). In these samples, specific immunostaining of sst5TMD4 shows a predominant intracellular localization. Specificity of the signal is supported by the absence of

immunostaining after incubating the sample with preadsorbed antibody (Fig. 4, L and N).

### Functional test for truncated sst5 isoforms measuring free cytosolic calcium level ( $[Ca^{2+}]_i$ )

The ability of each sst5 isoform to modify the  $[Ca^{2+}]_i$  kinetics in response to their natural ligands, SRIF and CST, was evaluated in CHO-K1 cells stably transfected with sst5 (positive control), sst5TMD5, or sst5TMD4 (Fig. 5). This approach demonstrated that cells transfected with full-length sst5 responded to SRIF and CST in a similar manner. Thus, both the proportion of responsive cells (41 and 54% for SRIF and CST, respectively) and the profile of the responses evoked showed comparable temporal and quantitative features (Fig. 5A). In striking contrast, most of the cells transfected with sst5TMD5 (60%) responded preferentially to SRIF, showing marked  $[Ca^{2+}]_i$  increases, whereas only 12% of those cells responded to CST, which evoked calcium rises of very low magnitude (Fig. 5B). Moreover, an opposite situation was observed for sst5TMD4, in that only 4% of the cells responded to SRIF by showing delayed, transient responses, whereas CST evoked clear  $[Ca^{2+}]_i$  increases in 43% of the cells transfected with this receptor (Fig. 5C).

### Discussion

The unrivaled pharmacological importance of GPCRs is demonstrated by the fact that 50–60% of approved drugs elicit their therapeutic effect by selectively targeting members of this superfamily (29). The signature feature of GPCRs are seven helices that transverse the membrane dividing the proteins into cytoplasmic, transmembrane, and extracellular domains. However, in recent years, new truncated GPCR isoforms with less than seven TMDs are being discovered, although little is known about their physiological role and functionality (18). Here we isolated and characterized, for the first time in the SRIF receptor family two novel truncated isoforms of the sst5 with five and four TMDs, accordingly termed sst5TMD5 and sst5TMD4. Moreover, we demonstrate that mRNAs for these two receptors are expressed differentially in normal tissues and are also present in diverse types of pituitary tumors. The precise implications of our results are still to be established, but they likely are of potential pathophysiological relevance. Thus, although SRIF analogs therapy has been widely used over 2 decades to treat a variety of endocrine pathologies, particularly pituitary tumors, it has been argued that not all actions (or lack thereof) of these analogs can be explained by the known properties of the ssts identified to date, suggesting the existence of new sst isoforms.

Indeed, although several authors proposed that, besides sst1-5, additional receptors for SRIF and/or CST should exist (7, 14–16), none had been identified hitherto, and this may be related to the uncommon molecular nature of sst5TMD5 and sst5TMD4. Thus, GPCRs are commonly encoded by genes with an exon-intron structure, wherein alternative splicing originates proteins with different length and sequence, specially within the C- and N-terminal tails, and the intracellular and extracellular loops, but also generating a shorter receptor isoform with less



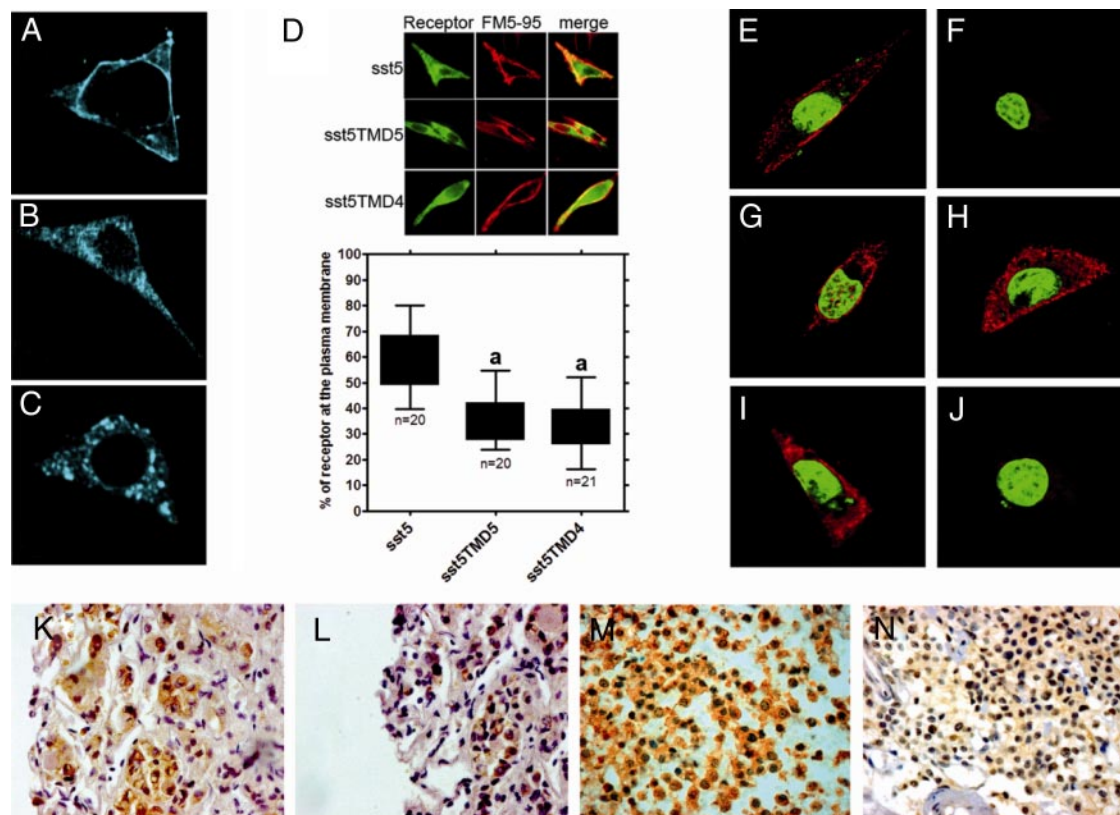

**FIG. 4.** Subcellular localization of the three sst5 isoforms and immunolabeling of sst5TMD4 in pituitary adenomas. Subcellular distribution was studied by confocal microscopy for full-length sst5 (A), sst5TMD5 (B), and sst5TMD4 (C) coupled in frame to the N-terminal domain of CFP and transfected in CHO-K1 cells. D, Pictures (top) and quantification (bottom graph) of colocalization, *in vivo*, of sst5-, sst5TMD5-, and sst5TMD4-CFP tagged receptors transiently transfected in CHO-K1 cells, with the membrane marker FM5-95. C shows the immunolabeling of untagged receptors with specific polyclonal antibodies. E, G, and I, Images of sst5, sst5TMD5, and sst5TMD4 transiently transfected CHO-K1 cells, respectively, immunolabeled with the polyclonal antiserum anti-sst5. An image of mock cells incubated with the same antibody is shown in F. H and J, Images of sst5TMD4-transfected cells immunolabeled with the polyclonal antiserum anti-sst5TMD4 and the preadsorbed antibody, respectively. K and M, Immunohistochemical detection of sst5TMD4 in two pituitary tumors using the anti-sst5TMD4 antibody or the preadsorbed antibody as shown in L and N. a,  $P < 0.001$  vs. sst5.

than seven TMDs (for review see Ref. 18). Such changes may alter the normal G protein coupling and signaling of the receptor and, less often, ligand recognition (18). At variance with the above, the two truncated sst5 isoforms described herein are not originated by classical alternative splicing because the sst5 gene, like the rest of ssts, lacks canonical introns in the CDS (2). Conversely, both sst5 variants are generated presumably by a splicing of the sst5 gene involving the presence of cryptic, noncanonical donor and acceptor splice sites in the CDS and 3' untranslated region, respectively, similar to that reported previously for sst2 (5), which generates two receptor variants that conserve seven TMDs but bear distinct C-tails (sst2A and sst2B). This atypical 3' splicing has likely precluded earlier prediction/detection of these sst5 receptor variants from its genomic sequence (GenInfo Identifier: 13937340) using bioinformatic tools.

Interestingly, various truncated GPCRs have been recently associated with tumor pathologies because it is the case for receptors for GHRH (19, 20) and particularly the family of adrenoceptors, which includes up to 11 alternatively spliced variants (21). Their function and relation with tumor processes are still quite unknown and sometimes paradoxical. For example, in lung cancer cells, truncated receptor for the orexigenic hormone ghrelin, GH secretagogue receptor 1b, of five TMDs, does not appear to respond to ghrelin itself but seems to form a heterodimer

with the neurotensin receptor 1, and this heterodimer, in turn, responds specifically to neuromedin U and induces cell proliferation in this type of cancer cells (30). Our results clearly demonstrate that the truncated sst5TMD5 and sst5TMD4 variants are differentially expressed in normal human tissues and pituitary tumors of diverse etiology, suggesting these transcripts may encode a peptide with potential physiological relevance in coordinating endocrine response to SRIF and CST in normal or pathological states.

Analysis of the localization of CFP-tagged receptors in CHO-K1 cells by confocal microscopy, and *in vivo* colocalization studies with the membrane marker FM5-95, demonstrated that both novel sst5 variants display a distinct subcellular distribution, *i.e.* preferentially in intracellular compartments, compared with the well-known predominant localization of the full-length sst5 at the plasma membrane. Interestingly, such preferential intracellular distribution of sst5TMD5 and sst5TMD4 is reminiscent of that atypically observed for sst5 by immunohistochemical methods in some human pancreatic tumors (31) and the human hepatocarcinoma cell line HepG2 (32) as well as for sst2 in human small-cell lung carcinomas (33) and sst1 in rat hypothalamic cells (34). Intracellular localization of GPCR is caused by heterotypic interaction of receptors (31–34). Our observation that both sst5TMD5 and sst5TMD4 are coexpressed



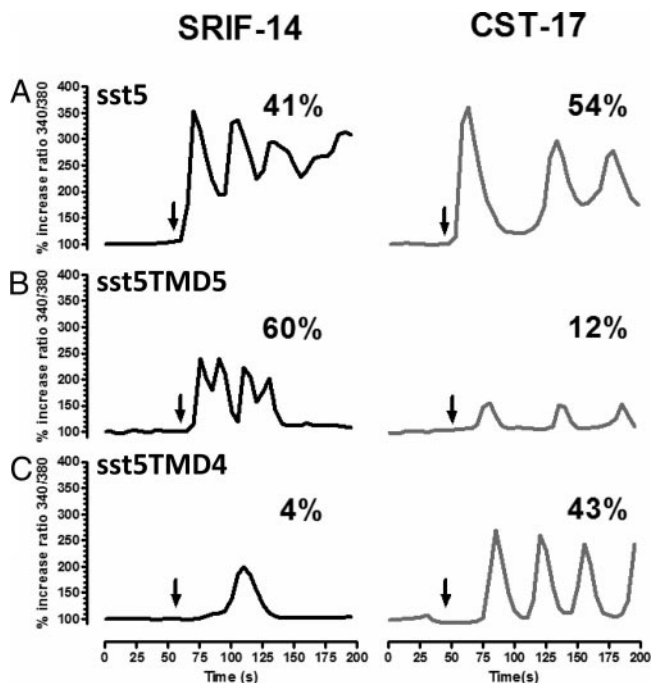

**FIG. 5.** Representative profiles of changes in the  $[Ca^{2+}]_i$  evoked by SRIF (left) and CST (right) in CHO-K1 cells transfected with each of the sst5 isoforms. A, Typical profiles of sst5 transfected cells in response to SRIF and CST (representative of 59 of 144 and 101 of 186 cells, respectively). B, Responses of cells transfected with sst5TMD5 (representative of 81 of 135 and 16 of 124 cells for SRIF and CST, respectively). C, Representative profiles of cells transfected with sst5TMD4, similar to that observed in other nine of 228 and 127 of 294 cells for SRIF and CST, respectively. The percentage of responsive cells is indicated in each graph. The arrow indicates the injection time.

with other sst subtypes in normal tissues and pituitary tumors agree with this possibility.

Despite the fact that sst5TMD5 and sst5TMD4 possess less than seven TMDs and display distinct C-terminal tails from that of the canonical sst5, both receptors maintain an intact N-terminal domain and the DRY motif located at the end of the third TMD, which is commonly involved in  $G\alpha$  protein coupling and selectivity of GPCRs (27, 28). In marked contrast to the general ability of all ssts, including full-length sst5, we observed that both receptors, transfected in CHO-K1 cells, failed to modulate either basal or forskolin-stimulated cAMP levels in response to various doses of SRIF (data not shown), thereby suggesting that these novel sst5 isoforms might not be functional *per se*. Yet additional functional studies using  $[Ca^{2+}]_i$  as a reporter signal demonstrated that this was not the case because both sst5TMD5 and sst5TMD4 were indeed able to elicit ligand-induced rises in  $[Ca^{2+}]_i$ .

This capacity of both receptors to induce a functional response despite lacking important structural elements for normal  $G_i$  protein coupling is uncommon but not unique. Thus, for example, the truncated calcitonin  $\Delta E13$  receptor of six TMDs lacks the ability to increase the cAMP level, whereas it is able to modulate the  $[Ca^{2+}]_i$  on activation by its ligand (35). Of note, this experimental approach unveiled a differential capacity of each receptor to mediate ligand-selective responses. Specifically, whereas sst5TMD5 predominantly responded to SRIF, sst5TMD4 almost exclusively responded to CST. These differ-

ences are not apparently due to a differential binding to SRIF or CST because in pilot studies using fluorescently tagged peptides, both truncated receptors seem to exhibit a similar, reduced ability to bind fluo-SRIF and fluo-CST in comparison with sst5 but do not show any appreciable difference between them (data not shown). Nevertheless, the selective activation by SRIF and CST was unexpected because there is no evidence to date that any sst can mediate a differential response to these highly similar peptides. In fact, SRIF and CST not only show comparable affinities for each sst but also share most of their known effects, specially at endocrine targets. However, CST exerts selective actions in processes such as induction of slow-wave sleep and reduction of locomotor activity (36) and as antiinflammatory peptide (37), although the receptors that mediate those unique actions are still unknown. In this scenario, it is tempting to speculate that these new receptor variants may be involved in some of the selective functions of SRIF and CST.

In summary, we report for the first time the existence of novel mRNA splice variants of the human sst5 gene, named sst5TMD5 and sst5TMD4, with five and four TMDs, respectively, which are expressed under normal, physiological conditions in different human tissues. These results support the often proposed notion that there exist additional ssts to the known sst1-5 and that they are generated by an uncommon mechanism. These new sst5 variants may be of physiological and pharmacological relevance because they are expressed in different pituitary tumors in an isoform-dependent manner. The fact that both novel sst5 variants are found in a different cellular localization to that of the long, originally identified sst5 isoform, together with the differential ability of each variant to mediate functional responses to the endogenous ligands SRIF (sst5TMD5) and CST (sst5TMD4) suggests that these transcripts may encode peptide receptors with important roles in regulating (patho)physiological states. As such, these results pave the way for the elucidation of the specific pathophysiological role of each sst5 variant and the identification of other putative new sst isoforms, which could enhance the already complex and highly versatile functional array comprised by SRIF, CST, and the sst1-5 family.

## Acknowledgments

The contribution of Dr. Frederic Bartumeus, Dr. María-José Barahona, and Dr. Nuria Sucunza (Hospital Sant Pau, Bracelona, Spain) in obtaining of pituitary samples is gratefully acknowledged. Centro de Investigación Biomédica en Red de Fisiopatología de la Obesidad y Nutrición is an initiative of Instituto de Salud Carlos III.

Address all correspondence and requests for reprints to: Dr. Justo P. Castaño, Department of Cell Biology, Physiology, and Immunology, Edificio Severo Ochoa. Planta 3, Campus de Rabanales, University of Córdoba, E-14014 Córdoba, Spain. E-mail: justo@uco.es.

This work was supported by Grants BIO-0139 and CTS-01705 from Junta de Andalucía and Grants BFU2004-03883 and BFU2007-60180/BFI from the Ministerio de Ciencia e Innovación/FEDER. Centro de Investigación Biomédica en Red is an initiative of Instituto de Salud Carlos III (Ministerio de Sanidad, Ministerio de Ciencia e Innovación, Spain).

Disclosure Summary: The authors have nothing to disclose.

## References

1. Weckbecker G, Lewis I, Albert R, Schmid HA, Hoyer D, Bruns C 2003 Opportunities in somatostatin research: biological, chemical and therapeutic aspects. *Nat Rev Drug Discov* 2:999–1017
2. Moller LN, Stidsen CE, Hartmann B, Holst JJ 2003 Somatostatin receptors. *Biochim Biophys Acta* 1616:1–84
3. Olias G, Viollet C, Kusserow H, Epelbaum J, Meyerhof W 2004 Regulation and function of somatostatin receptors. *J Neurochem* 89:1057–1091
4. Patel YC, Greenwood M, Panetta R, Hukovic N, Grigorakis S, Robertson LA, Srikant CB 1996 Molecular biology of somatostatin receptor subtypes. *Metabolism* 45:31–38
5. Reisine T, Kong H, Raynor K, Yano H, Takeda J, Yasuda K, Bell GI 1993 Splice variant of the somatostatin receptor 2 subtype, somatostatin receptor 2B, couples to adenylyl cyclase. *Mol Pharmacol* 44:1016–1020
6. Vanetti M, Kouba M, Wang X, Vogt G, Hollt V 1992 Cloning and expression of a novel mouse somatostatin receptor (SSTR2B). *FEBS Lett* 311:290–294
7. de Lecea L, Castano JP 2006 Cortistatin: not just another somatostatin analog. *Nat Clin Pract Endocrinol Metab* 2:356–357
8. Volante M, Rosas R, Allia E, Granata R, Baragli A, Muccioli G, Papotti M 2008 Somatostatin, cortistatin and their receptors in tumours. *Mol Cell Endocrinol* 286:219–229
9. Gabete MD, Duran-Prado M, Luque RM, Martinez-Fuentes AJ, Vazquez-Martinez R, Malagon MM, Castano JP 2008 Are somatostatin and cortistatin two siblings in regulating endocrine secretions? *In vitro* work ahead. *Mol Cell Endocrinol* 286:128–134
10. Gonzalez-Rey E, Chorny A, Del Moral RG, Varela N, Delgado M 2007 Therapeutic effect of cortistatin on experimental arthritis by downregulating inflammatory and Th1 responses. *Ann Rheum Dis* 66:582–588
11. Gonzalez-Rey E, Delgado M 2007 Emergence of cortistatin as a new immunomodulatory factor with therapeutic potential in immune disorders. *Mol Cell Endocrinol* 286:135–140
12. Jaquet P, Saveanu A, Barlier A 2005 New SRIF analogs in the control of human pituitary adenomas: perspectives. *J Endocrinol Invest* 28:14–18
13. Taboada GF, Luque RM, Bastos W, Guimaraes RF, Marcondes JB, Chimelli LM, Fontes R, Mata PJ, Filho PN, Carvalho DP, Kineman RD, Gadelha MR 2007 Quantitative analysis of somatostatin receptor subtype (SSTR1–5) gene expression levels in somatotropinomas and non-functioning pituitary adenomas. *Eur J Endocrinol* 156:65–74
14. Tallent M, Dichter MA, Reisine T 1996 Evidence that a novel somatostatin receptor couples to an inward rectifier potassium current in AtT-20 cells. *Neuroscience* 73:855–864
15. Chanson P, Timsit J, Harris AG 1993 Clinical pharmacokinetics of octreotide. Therapeutic applications in patients with pituitary tumours. *Clin Pharmacokinet* 25:375–391
16. Jones RH, Reubi JC, Millan D, Vasey P 2004 Octreotide: an active agent in epithelial ovarian carcinoma? *Lancet Oncol* 5:251–253
17. Saveanu A, Gunz G, Dufour H, Caron P, Fina F, Ouafik L, Culler MD, Moreau JP, Enjalbert A, Jaquet P 2001 Bim-23244, a somatostatin receptor subtype 2- and 5-selective analog with enhanced efficacy in suppressing growth hormone (GH) from octreotide-resistant human GH-secreting adenomas. *J Clin Endocrinol Metab* 86:140–145
18. Kilpatrick GJ, Dautzenberg FM, Martin GR, Eglen RM 1999 7TM receptors: the splicing on the cake. *Trends Pharmacol Sci* 20:294–301
19. Havt A, Schally AV, Halmos G, Varga JL, Toller GL, Horvath JE, Szepeshazi K, Koster F, Kovitz K, Groot K, Zarandi M, Kanashiro CA 2005 The expression of the pituitary growth hormone-releasing hormone receptor and its splice variants in normal and neoplastic human tissues. *Proc Natl Acad Sci USA* 102:17424–17429
20. Rekasi Z, Czompolty T, Schally AV, Halmos G 2000 Isolation and sequencing of cDNAs for splice variants of growth hormone-releasing hormone receptors from human cancers. *Proc Natl Acad Sci USA* 97:10561–10566
21. Hawrylyshyn KA, Michelotti GA, Coge F, Guenin SP, Schwinn DA 2004 Update on human  $\alpha 1$ -adrenoceptor subtype signaling and genomic organization. *Trends Pharmacol Sci* 25:449–455
22. McWilliams DF, Watson SA, Crosbee DM, Michaeli D, Seth R 1998 Coexpression of gastrin and gastrin receptors (CCK-B and  $\Delta$ CCK-B) in gastrointestinal tumour cell lines. *Gut* 42:795–798
23. Patel YC, Panetta R, Escher E, Greenwood M, Srikant CB 1994 Expression of multiple somatostatin receptor genes in AtT-20 cells. Evidence for a novel somatostatin-28 selective receptor subtype. *J Biol Chem* 269:1506–1509
24. Luque RM, Duran-Prado M, Garcia-Navarro S, Gracia-Navarro F, Kineman RD, Malagon MM, Castano JP 2006 Identification of the somatostatin receptor subtypes (sst) mediating the divergent, stimulatory/inhibitory actions of somatostatin on growth hormone secretion. *Endocrinology* 147:2902–2908
25. Duran-Prado M, Bucharles C, Gonzalez BJ, Vazquez-Martinez R, Martinez-Fuentes AJ, Garcia-Navarro S, Rhodes SJ, Vaudry H, Malagon MM, Castano JP 2007 Porcine somatostatin receptor 2 displays typical pharmacological sst2 features but unique dynamics of homodimerization and internalization. *Endocrinology* 148:411–421
26. Van Zeveren AM, Visser A, Hoorens PR, Vercruyse J, Claerebout E, Geldhof P 2007 Evaluation of reference genes for quantitative real-time PCR in *Ostertagia ostertagi* by the coefficient of variation and geNorm approach. *Mol Biochem Parasitol* 153:224–227
27. Burstein ES, Spalding TA, Brann MR 1998 The second intracellular loop of the m5 muscarinic receptor is the switch which enables G-protein coupling. *J Biol Chem* 273:24322–24327
28. Gether U 2000 Uncovering molecular mechanisms involved in activation of G protein-coupled receptors. *Endocr Rev* 21:90–113
29. Siehler S 2008 Cell-based assays in GPCR drug discovery. *Biotechnol J* 3:471–483
30. Takahashi K, Furukawa C, Takano A, Ishikawa N, Kato T, Hayama S, Suzuki C, Yasui W, Inai K, Sone S, Ito T, Nishimura H, Tsuchiya E, Nakamura Y, Daigo Y 2006 The neuromedin U-growth hormone secretagogue receptor 1b/neurotensin receptor 1 oncogenic signaling pathway as a therapeutic target for lung cancer. *Cancer Res* 66:9408–9419
31. Papotti M, Bongiovanni M, Volante M, Allia E, Landolfi S, Helboe L, Schindler M, Cole SL, Bussolati G 2002 Expression of somatostatin receptor types 1–5 in 81 cases of gastrointestinal and pancreatic endocrine tumors. A correlative immunohistochemical and reverse-transcriptase polymerase chain reaction analysis. *Virchows Arch* 440:461–475
32. Notas G, Kolios G, Mastrodimou N, Kampa M, Vasilaki A, Xidakis C, Castanas E, Themos K, Kouroumalis E 2004 Cortistatin production by HepG2 human hepatocellular carcinoma cell line and distribution of somatostatin receptors. *J Hepatol* 40:792–798
33. Reubi JC, Waser B, Liu Q, Laissue JA, Schonbrunn A 2000 Subcellular distribution of somatostatin sst2A receptors in human tumors of the nervous and neuroendocrine systems: membranous versus intracellular location. *J Clin Endocrinol Metab* 85:3882–3891
34. Stroh T, Sarret P, Tannenbaum GS, Beaudet A 2006 Immunohistochemical distribution and subcellular localization of the somatostatin receptor subtype 1 (sst1) in the rat hypothalamus. *Neurochem Res* 31:247–257
35. Seck T, Pellegrini M, Florea AM, Grignoux V, Baron R, Mierke DF, Horne WC 2005 The  $\Delta$ 13 isoform of the calcitonin receptor forms a six-transmembrane domain receptor with dominant-negative effects on receptor surface expression and signaling. *Mol Endocrinol* (Baltimore, Md) 19:2132–2144
36. Spier AD, de Lecea L 2000 Cortistatin: a member of the somatostatin neuropeptide family with distinct physiological functions. *Brain Res Brain Res Rev* 33:228–241
37. Gonzalez-Rey E, Chorny A, Robledo G, Delgado M 2006 Cortistatin, a new antiinflammatory peptide with therapeutic effect on lethal endotoxemia. *J Exp Med* 203:563–571
